# Supplementary material
Source: PubMed Central journal article supplement (PMC4046098)
Supplement: fj.12-205419.sf1.pdf [file fj.12-205419.sf1.pdf]

Figure S1
