# Supplementary material
Source: PubMed Central journal article supplement (PMC4046098)
Supplement: fj.12-205419.st1.pdf [file fj.12-205419.st1.pdf]

**Supplementary Table 1:** Sequences of obscurin fragments obtained from non-transformed (MCF10A) and cancer (MCF7) breast epithelial cell lines were aligned to the mRNA entries coding for human obscurin-A (accession number NM\_052843.2) and obscurin-B (accession number NM\_001098623). In addition to the seven previously identified and twelve novel mutations detected in obscurin transcripts derived from MCF7 cells, we also found a novel polymorphism (T→G) in position 23,091 of the obscurin-B transcript that results in a missense mutation (Phe→Val) within the SKI kinase domain in both MCF10A and MCF7 cells. NR = Not Reported in dbSNP database.

| Nucleotide | Base Change          | Domain           | Mutation            | Codon position | Amino acid | dbSNP accession number |
|------------|----------------------|------------------|---------------------|----------------|------------|------------------------|
| 13969      | C→G                  | Ig47             | Missense            | 2              | Ser→Cys    | rs1188729              |
| 14000      | T→C                  | Ig47             | Synonymous          | 3              | Gly→Gly    | rs1188728              |
| 14929      | A→G                  | Ig48             | Missense            | 2              | Asp→Gly    | rs373610               |
| 15371      | T→C                  | Linker Ig48-Ig49 | Synonymous          | 3              | Pro→Pro    | NR                     |
| 15728      | T→C                  | Linker Ig49-Ig50 | Synonymous          | 3              | Asp→Asp    | NR                     |
| 15849      | C→G                  | Ig50             | Missense            | 1              | Leu→Val    | rs369909               |
| 16721      | C→A                  | Linker Ig51-SH3  | Synonymous          | 3              | Pro→Pro    | rs3795808              |
| 17240      | T→C                  | RhoGEF           | Synonymous          | 3              | Ala→Ala    | rs505629               |
| 17513      | A→G                  | RhoGEF           | Synonymous          | 3              | Pro→Pro    | NR                     |
| 17671      | A→G                  | Linker RhoGEF-PH | Missense            | 2              | Asn→Ser    | NR                     |
| 17715      | C→G                  | PH               | Missense            | 1              | Gln→Glu    | rs1188710              |
| 17835      | A→G                  | PH               | Missense            | 1              | Ile→Val    | NR                     |
| 17960      | G→A                  | PH               | Nonsense            | 3              | Trp→STOP   | NR                     |
| 19879      | A→G                  | SKII             | Missense            | 2              | Gln→Arg    | NR                     |
| 20008      | *Insertion of 38 nts | SKII             | Insertion/ Nonsense |                |            | NR                     |
| 20245      | A→G                  | SKII             | Missense            | 2              | Asn→Ser    | NR                     |
| 20403      | G→A                  | Linker SKII-Ig55 | Missense            | 1              | Gly→Ser    | NR                     |
| 22377      | A→G                  | Linker SKII-Ig55 | Missense            | 1              | Lys→Glu    | NR                     |
| 22452      | T→C                  | Ig55             | Missense            | 1              | Ser→Pro    | NR                     |

\*: The following nucleotides are inserted after position 20,008: 5' CAGGGCCTCATCTGAGGGCTGG ACCCTCCCTCTGTCTT 3', leading to a frameshift mutation and premature termination of Obscurin-B.
