# Supplementary material
Source: PubMed Central journal article supplement (PMC4046098)

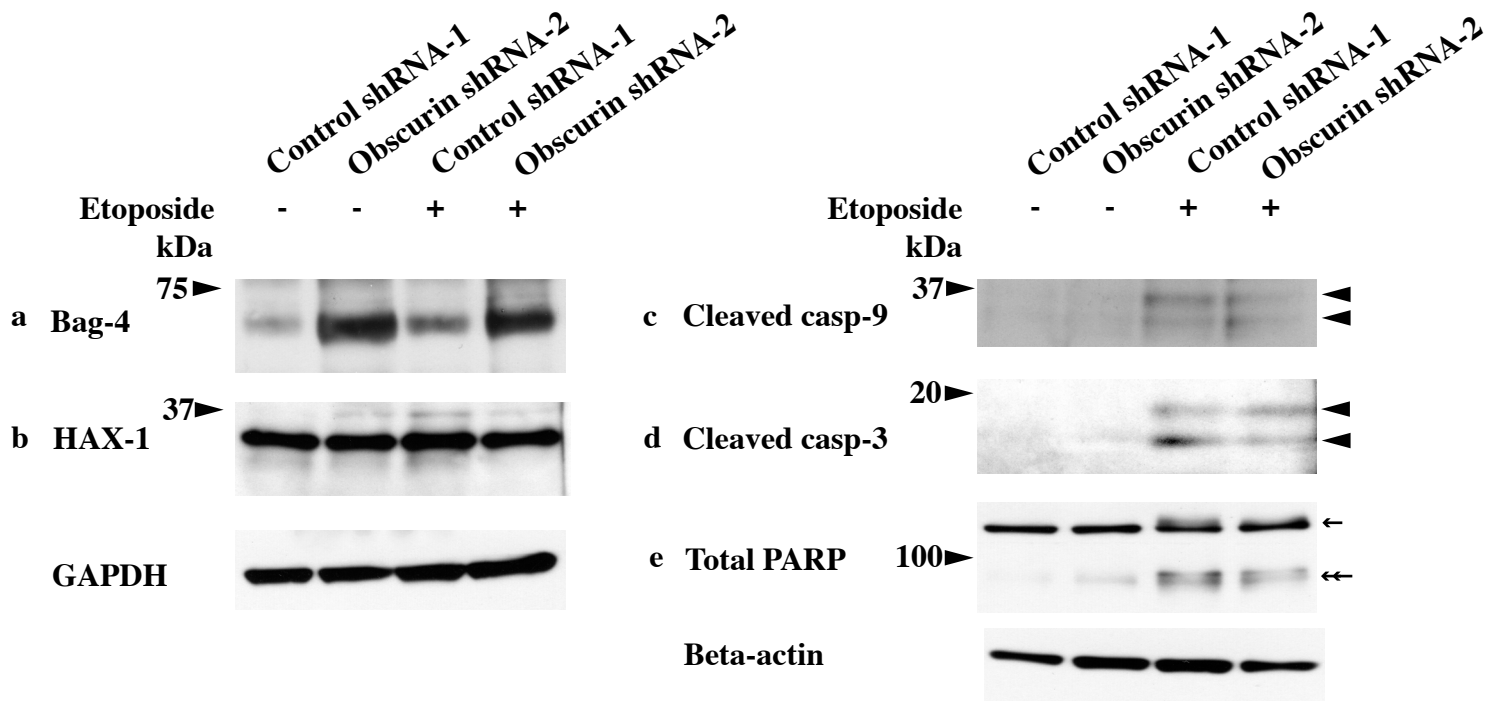

Figure S2

Supplement: fj.12-205419.sf2.pdf [file fj.12-205419.sf2.pdf]
